## A short-term water demand forecasting model using multivariate long short-term memory with meteorological data

Ariele Zanfei <sup>a,\*</sup>, Bruno Melo Brentan<sup>b</sup>, Andrea Menapace<sup>a</sup> and Maurizio Righetti<sup>a</sup>

<sup>a</sup> Faculty of Science and Technology, Free University of Bozen-Bolzano, Piazza Università 5, Bolzano, Italy

<sup>b</sup> Hydraulic Engineering and Water Resources Department, School of Engineering, Federal University of Minas Gerais, Belo Horizonte 31270-901, Brazil

\*Corresponding author. E-mail: ariele.zanfei@unibz.it

 AZ, 0000-0002-3759-6421

### ABSTRACT

Sustainable management of water resources is a key challenge nowadays and in the future. Water distribution systems have to ensure fresh water for all users in an increasing demand scenario related to the long-term effects due to climate change. In this context, a reliable short-term water demand forecasting model is crucial for the optimal management of water resources. This study proposes a novel deep learning model based on long short-term memory (LSTM) neural networks to forecast hourly water demand. Due to the limitations of using multiple input sequences with different time lengths using LSTM, the proposed deep learning model is developed with two modules that process different temporal sequences of data: a first module aimed at dealing with short-term meteorological information and a second module aimed at representing the longer-term information of the water demand. The proposed dual-module structure allows a multivariate selection of the inputs with sequences of a different time length. The performance of the proposed deep learning model is compared to a conventional multi-layer perceptron (MLP) and a seasonal integrated moving average (SARIMA) model in a real case study. The results highlight the potential of the proposed multivariate approach in short-term water demand prediction, outperforming the more conventional approaches.

**Key words:** artificial neural network, deep learning, long short-term memory, machine learning, water demand forecasting, water distribution systems

### HIGHLIGHTS

- This study proposes a novel short-term water demand forecasting model using multivariate long short-term memory with meteorological data.
- The proposed dual-module structure allows to process different temporal sequences of data.
- The model is tested on a real case study, outperforming state-of-art methods.
- This study highlights the importance of a multivariate approach, especially due to climate change.

## GRAPHICAL ABSTRACT

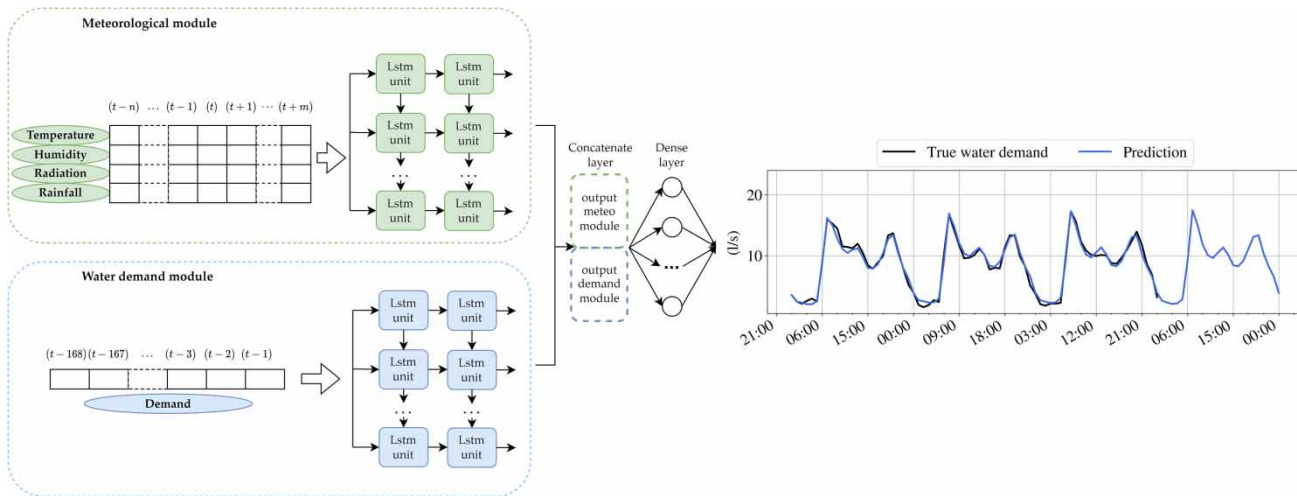

## INTRODUCTION

Nowadays, the efficiency of a water distribution system (WDS) is crucial for preserving drinking water resources. This latter is demanding more sustainable management in the future. In the world of water management, the constant increase of water demands from agriculture, industries and humans due to climate change and socio-economic factors is forcing practitioners to deal with the demanding request to optimise as much as possible the management of the available water resource.

The water distribution infrastructures, following the similar trend of energy grids, have started an important renewal process in the last years in order to modify the actual paradigm of current networks and move towards the concept of smart grids (Menapace *et al.* 2020a; Ramos *et al.* 2020). This important paradigm change to a green and smart system is nowadays even more required for water supply systems, due to climate change that is increasing the global water demand and putting under strain the WDSs (Wang *et al.* 2016). Climate change cannot be ignored and it is now evident in many parts of the world (e.g., Yu *et al.* 2014; Elkiran *et al.* 2021), where the water resources availability is getting reduced by climate modification. In this context, wastes of water, like leakages in WDS, are not acceptable (Menapace *et al.* 2020b; Zanfei *et al.* 2020) and there is a need to be addressed through proper management of the water systems.

In this context, the era of Big Data and Machine Learning provides new tools and algorithms that are the future of sustainable water use (Savic 2019). Nowadays, these new techniques allow to develop reliable and advanced tools that effectively can contribute to improving water management. In the latest decades, many studies attempted to develop these tools for many tasks, for instance, developing digital twins for state estimation (Bonilla *et al.* 2022), algorithms for burst and leakage detection (Wu & Liu 2017), developing data analysis techniques for smart water metering systems (Rahim *et al.* 2020), modelling water demand (House-Peters & Chang 2011), for intrusion detection (Mboweni *et al.* 2021), and much more different and important tasks. Among plenty of possible techniques that can be developed with these data-driven approaches, one of the most important one is certainly water demand forecasting (e.g., Herrera *et al.* 2010; Pacchin *et al.* 2019; Zanfei *et al.* 2022a). In general, many applications of forecasting models show how such techniques can improve and optimise the management of water resources. For instance, such improvements can be seen in the context of hydropower systems optimisation (Avesani *et al.* 2022) or for improving the efficiency of the pumping schedules and reducing the operation costs related to the irrigation of water systems (Pulido-Calvo & Gutierrez-Estrada 2009) and surely for the WDSs management (Alvisi *et al.* 2007). For instance, Bakker *et al.* (2013) showed that the usage of a water demand forecasting model allowed important saves in a WDS in the Netherlands. In fact, the use of a reliable water demand forecasting model allows to manage better the water resource, meaning saving both water and energy and lowering costs.

In general, water demand forecasting can be categorised based on the forecasting horizon: short term, medium term and long term. In particular, medium-term and long-term forecasting is more related to decision problems with higher time horizons, like planning and investment making (Donkor *et al.* 2014). Short-term forecasting, which is the main target of this study, is particularly important for tackling operational decisions concerning the operational management and optimisation

of a WDS. In this field, many researchers have provided important contributions in the last decade, especially using deep learning techniques that achieved high success in many fields (Schmidhuber 2015). This is the case of Guo *et al.* (2018), where the authors proposed a short-term water demand forecasting model based on a deep learning architecture using gated recurrent units (Chung *et al.* 2014). The authors proposed a model tested on data of some district metering areas in China. The authors highlighted the high performance of such a model, showing its ability to outperform conventional models like multi-layer perceptron (MLP) and a seasonal integrated moving average (SARIMA).

Furthermore, other authors also proposed combining deep learning techniques with ensemble approaches. For instance, Ambrosio *et al.* (2019) proposed to develop a machine learning committee model to forecast the water demand of a time series in Brazil. The authors aimed to propose an ensemble machine learning model able to efficiently use the strength of many sub-models (i.e., the single machine learning models). Therefore, the authors tested plenty of methodologies to combine the sub-models, showing that the final resulting ensemble was able to outperform all the single sub-models. Another application was proposed by Xenochristou & Kapelan (2020), where the authors proposed an ensemble stacked model to predict water demand data of a city in England. Also, in this case, the authors highlighted the superior performances of such an ensemble approach that was able to outperform the more conventional and single models, like a conventional artificial neural network, random forest and plenty of others.

Although plenty of studies developed water demand forecasting models using only past observation of water demand data as input (e.g., Guo *et al.* 2018; Mu *et al.* 2020; Zanfei *et al.* 2022b), some studies highlighted the importance of using meteorological variables due to their correlation with water demand (Brentan *et al.* 2017) and the impact of climate change in water consumption (Fiorillo *et al.* 2021). The present study proposes a deep learning model based on multivariate long short-term memory (LSTM) (Hochreiter & Schmidhuber 1997) units to build a short-term forecasting model to predict hourly urban water demand. This study aims to propose a novel and performing deep learning model with a multivariate approach for short-term water demand forecasting. Despite the scientific literature having plenty of important and powerful methodologies for such tasks, water demand forecasting is still an open topic that can be improved due to the rise of novel techniques and the continuous increase of computational power and data availability. Furthermore, conventional multivariate recurrent neural networks (RNNs) require to have inputs that, if composed of multiple features, these latter should have the same time lengths. Therefore, to overcome the problem of using samples with different time lengths using RNNs, this model is composed of two modules. The first module deals only with past observation data of water demand that accounts for short-time dependencies (i.e., immediate previous observations) and long-time dependencies (i.e., weekly past observations). This module has to extract the temporal information of the water demand using the past observation with a time horizon of a week. The second module regards the short-term representation of weather data, where the module has to extract meaningful features regarding the actual meteorological condition. It is worth noting that the two modules process data with different time horizons. The first module uses data with a longer horizon, while the meteorological module deals with shorter horizon data for providing a representation of the actual weather condition. The representation of the two modules is then merged to provide the prediction output. The proposed approach is tested on real water demand data and compared to two conventional methods, namely an MLP model and a SARIMA model. The results highlight the high prediction performance of the novel proposed methodology showing that such deep learning model can outperform the two conventional methods.

The paper is structured as follows: Section Materials and Methods presents the framework of the proposed methodology; Section LSTM units discusses the model architecture with particular attention to the input sequences, and Section Benchmark models presents the MLP and the SARIMA methods adopted as benchmarks in the study. Furthermore, Section Case study presents the data adopted for evaluating the methodology, Section Performance evaluation metrics shows the error measures adopted to assess the model performances, and Section Tuning M-LSTM shows the iterative grid search method used to optimally tune the presented multivariate model. Subsequently, Section Results and discussion presents the achievements and the major highlights of the study and finally, Section Conclusion reports the final remarks.

## MATERIALS AND METHODS

This paper proposes a multivariate deep learning model based on LSTM, later named as M-LSTM, to forecast hourly water demand using weather data. In fact, LSTM has shown recently remarkable results in water demand forecasting (e.g., Mu *et al.* 2020; Zanfei *et al.* 2022b). Figure 1 shows the proposed model.

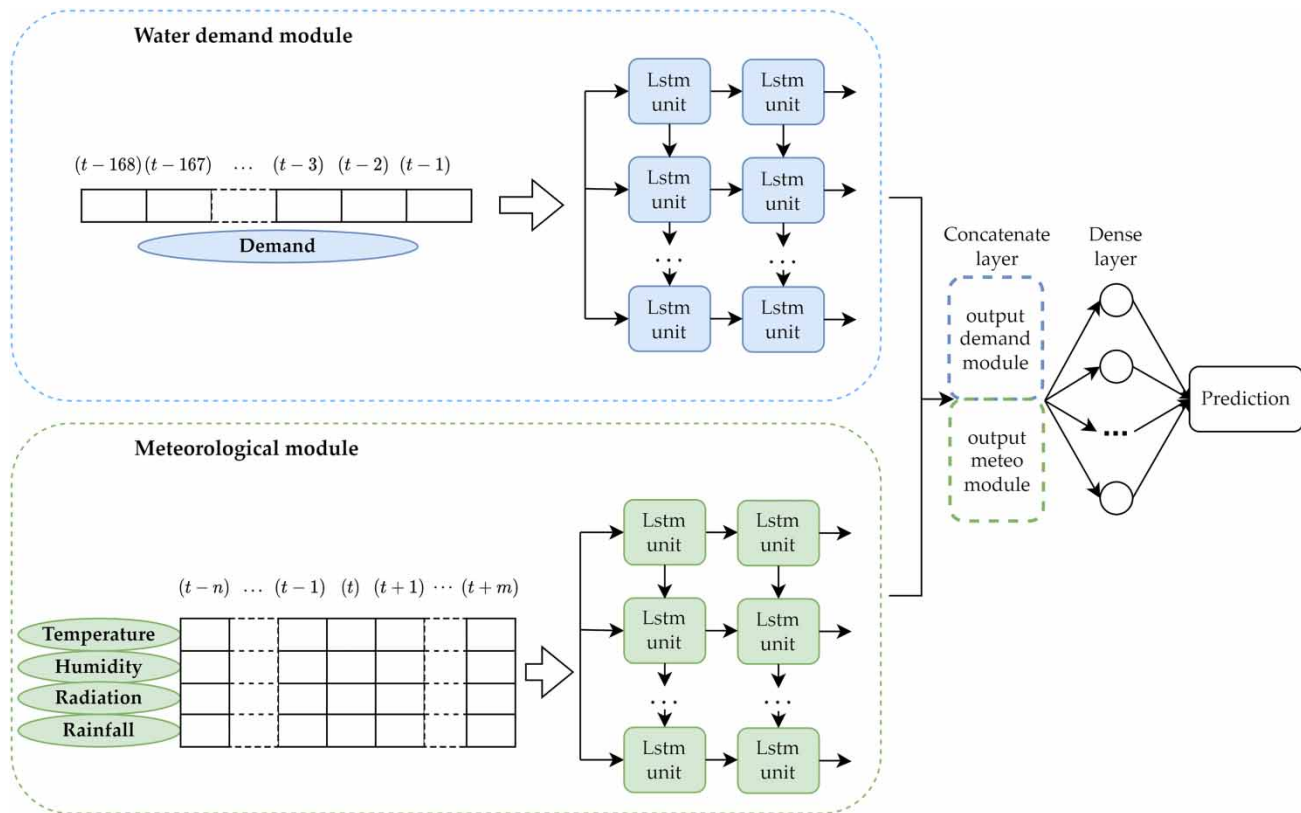

**Figure 1** | A diagram of the multivariate LSTM-based model proposed in this study.

The proposed M-LSTM model is shown in Figure 1, where the two-module structure is highlighted. The first module, called the water demand module, is responsible to deal only with water demand data. This module aims to extract and learn the temporal information of these data using the LSTM units. In particular, the data adopted as input for this module are the hourly past observations of water demand. This temporal sequence of data is 7 days long, meaning that it is composed of 168-hourly data, to allow the LSTM units to catch the daily and weekly seasonalities of the demand. Differently, the meteorological module uses less past observations, for providing an actual representation of the weather condition at the prediction time frame. It is worth noting that Figure 1 includes the input variables for the meteorological module. The considered weather data adopted include the temperature, the humidity, the radiation and the rainfall. All these data are fed into the module with a sequence that has past observation until the time step  $n$  and forecast until time step  $m$ . The parameters  $n$  and  $m$  depend on the aim of the forecasting model. In this study, it is proposed to test the model for two short-term forecasting applications. The first application concerns the test for predicting only the following hourly value. The second application is the simultaneous prediction of the following 24-hourly values. These two different tests have a different scope and can support the water utilities at different levels. For instance, the first application can support the detection of anomalies in the system like bursts, while the second application can provide important information for the actual operational management of the system. For these two applications, the input of the meteorological module is different. Concerning the prediction of only 1 h,  $n$  assumes the value of three, while  $m$  the value of zero. This means that the sequence input of the model has a length of four and comprises the three nearest past observations and the simultaneous value of the prediction at the time step  $t$ . Concerning the simultaneous prediction of 24-hourly values,  $n$  assumes the value of zero, while  $m$  becomes 23, meaning a sequence of 24 values that cover the whole duration of the time step target of the prediction. In this case, it is simplified by using the historical measured meteorological variables instead of the meteorological forecast, without evaluating the uncertainty related to this simplification. It is worth clarifying that the prediction of 24-hourly values is made simultaneously every 24 time steps, meaning that the output of the model covers, at the same moment, the whole day duration.

Once the two modules provide their outputs through the LSTM units, a concatenate layer merges their representations. This latter operation allows to unify the output of the two modules into a single one. For the sake of clarity, the concatenation allows only to merge the numerical output of the models, without any further operation. Therefore, the concatenated output is afterwards fed into a dense layer, in order to provide the final prediction with the desired dimension (i.e., number of outputs) depending on the aim of the prediction task. All the parameters of this model are further discussed in Section *Tuning M-LSTM*, where it is proposed to employ the iterative grid search from [Menapace et al. \(2021\)](#) in order to find the optimal set of nodes and layers for both the modules that composes the M-LSTM.

**LSTM units**

RNNs have been designed to deal with data affected by temporal relationships. In their original versions ([Elman 1990](#); [Jordan 1997](#)), RNNs were designed as a sequence of computing units that had not only feedforward connections but also connections between each cell. However, due to the vanishing gradient issue that was affecting conventional RNNs, the ability of these latter to learn long-time patterns was not effective. For this reason, LSTM has been proposed ([Hochreiter & Schmidhuber 1997](#)). The LSTM unit adopted in this paper is the conventional one and it is depicted in [Figure 2](#).

[Figure 2](#) depicts the LSTM unit that belong to the first layer of the network, meaning the one that receives directly the input data represented by  $x(t)$ . Furthermore, the mechanism of the LSTM is based on a series of gates that have the aim of managing the temporal information that goes through the unit. These gates are the forget gate, the input gate and the output gate, each one with its own state  $f_t$ ,  $i_t$  and  $o_t$ , respectively. The mechanism of this unit is summarised using the following equations:

$$f_t = \sigma(W_f h_{t-1} + U_f x_t + b_f) \tag{1}$$

$$i_t = \sigma(W_i h_{t-1} + U_i x_t + b_i) \tag{2}$$

$$C_t = f_t C_{t-1} + i_t \tanh(W_c h_{t-1} + U_c x_t + b_c) \tag{3}$$

$$o_t = \sigma(W_o h_{t-1} + U_o x_t + b_o) \tag{4}$$

$$h_t = o_t \tanh(C_t) \tag{5}$$

where the weights and the biases that belong to each gate of the LSTM unit are  $U_f, W_f$  and  $b_f$ ;  $U_i, W_i$  and  $b_i$ ;  $U_c, W_c$  and  $b_c$ ; and  $U_o, W_o$  and  $b_o$ , respectively. As shown in the figure, the used activation functions are the hyperbolic tangent ( $\tanh$ ) and the sigmoid ( $\sigma$ ).

**Benchmarks models**

To provide a comparison between the proposed multivariate LSTM model and some baseline approaches, it is proposed to use as a benchmark a conventional MLP model and a SARIMA model. Concerning the first one, it has been widely adopted

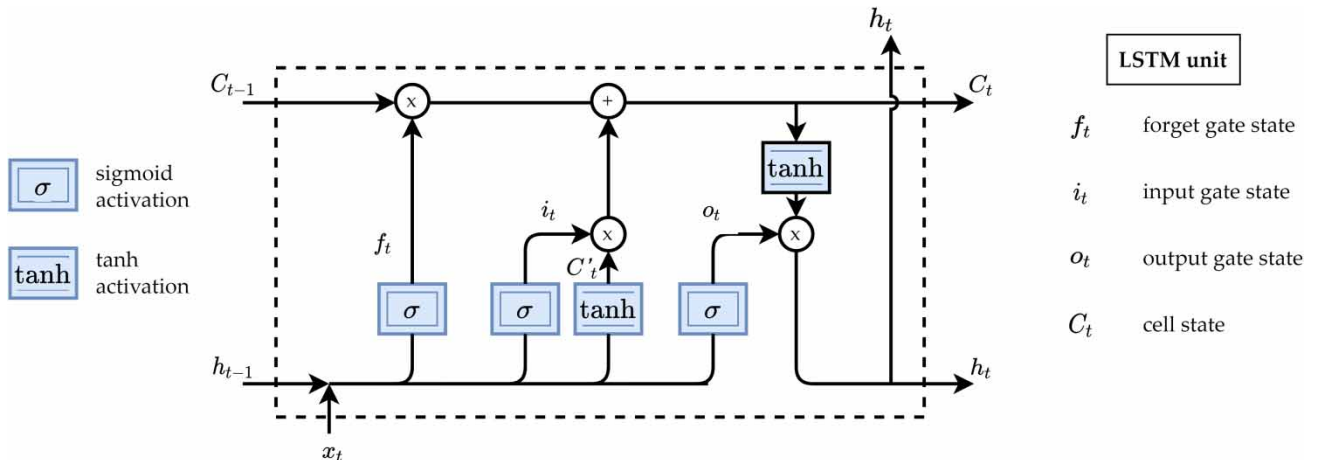

**Figure 2** | A diagram of the LSTM unit adopted in this study.

in many studies (e.g., Bougadis *et al.* 2005; Adamowski & Karapataki 2010) with remarkable results and it is still considered a solid benchmark (e.g., Guo *et al.* 2018; Mu *et al.* 2020). These kinds of networks are organised in a sequence of units, called perceptrons, that are grouped together in layers. An MLP can count on an input layer that is directly fed with the input data. This layer is followed by one or multiple hidden layers that propagate the information in the network until the output layer provides the desired outcome of the model. The MLP is also called feedforward, since the information goes progressively from the input layer, to the hidden layer and the output layer. In this study, it is proposed to use a conventional three-layer MLP, with an input layer, a hidden layer and an output layer. The selected number of neurons for the hidden layer resulting from a conventional grid search process is 128, with the rectified linear units as activation functions. The training is performed using the Adam optimiser (Kingma & Ba 2014).

Concerning the SARIMA model, this latter has been selected due to the seasonal patterns that affect the water demand time series (Oliveira *et al.* 2017). In addition, the order of the model is chosen using the conventional approach based on the auto-correlation function and the partial auto-correlation functions.

### Case study

To test the proposed approach, the data of a small WDS in the north of Italy are used. The WDS provides water for approximately 5,000 users. The nature of this WDS is almost all related to the residential use, accounting for needs related to irrigation of the green field of the belonging town and the users. In particular, the WDS is a typical mountain system, with important differences in the elevations that generate high pressures in the network. Concerning the meteorological data, the adopted time series are the rainfall, the temperature, the air humidity and the solar radiation, and they have all hourly time steps. A complete view of 2 months of these data is shown in Figure 3.

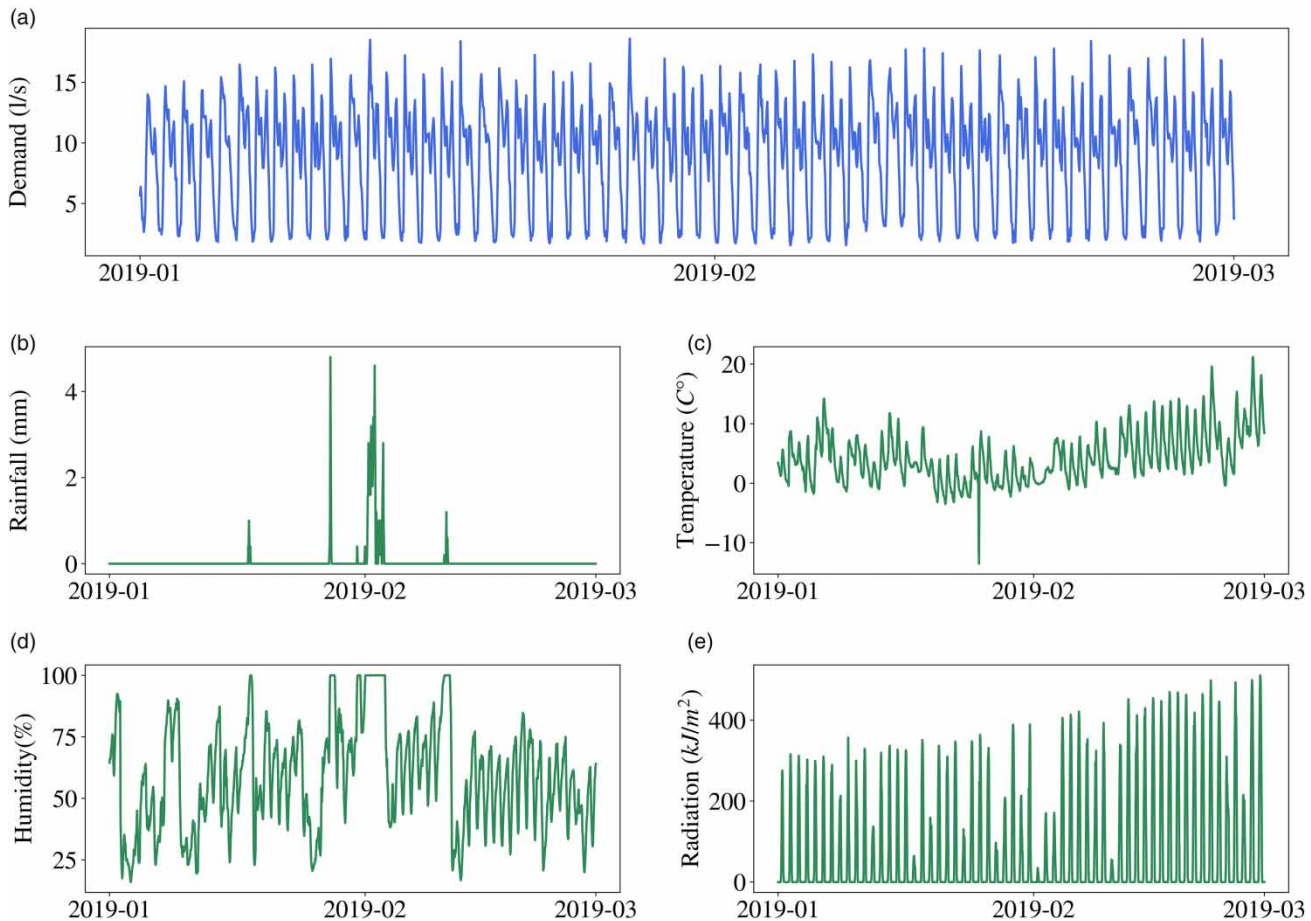

**Figure 3** | The portion of 2 months of data of the time series used for the case study. Panel (a) depicts the water demand time series, whereas panels (b)–(e) show the meteorological variables of rainfall, temperature, humidity and solar radiation, respectively.

Concerning the demand data shown in panel (a) of Figure 3, it emerges the typical behaviour of the water demand, with its own daily seasonality. In addition, the reduced number of users of the WDS affects the variability of the demand signal, which has some important differences day by day. Whereas the other panels show the meteorological variables adopted in the study. These latter are the rainfall, the temperature, the humidity and the radiation in panels (b)–(e) of Figure 3, respectively. In addition, the data are filtered to deal with the few outliers and missing values that are in the datasets. In particular, the outliers that are at least 2 standard deviations larger than the mean value for that hour of the day are filtered. For this purpose, the K-nearest neighbour algorithm is adopted to perform the imputation process (Zanfei *et al.* 2022c).

The datasets have an hourly time step and are almost 7 years long, starting from January 2013 and ending in September 2019. The whole first 6 years of the data are used for training and validating the model, while 2019 (i.e., 9 months of data) is used for testing and evaluating the model performances. A computer with Windows 10 and with an AMD Threadripper 3960X processor is used to develop the predictions using some ad hoc codes developed based on the Keras (Chollet *et al.* 2015) and TensorFlow (Abadi *et al.* 2016) libraries in Python.

### Performance evaluation metrics

To assess the performance of the proposed forecasting model, it is proposed to use the statistical metrics of the mean squared error (MSE), the mean absolute percentage error (MAPE), the determination coefficient ( $R^2$ ) and the mean absolute error (MAE) shown subsequently, through the below equations:

$$\text{MSE} = \frac{1}{Z} \sum_{i=1}^Z (Y_i - \hat{Y}_i)^2 \quad (6)$$

$$\text{MAPE} = \frac{100}{Z} \sum_{i=1}^Z \left| \frac{Y_i - \hat{Y}_i}{Y_i} \right| \quad (7)$$

$$\text{MAE} = \frac{1}{Z} \sum_{i=1}^Z |Y_i - \hat{Y}_i| \quad (8)$$

$$R^2 = 1 - \frac{\sum_{i=1}^Z (Y_i - \hat{Y}_i)^2}{\sum_{i=1}^Z (Y_i - \bar{Y})^2} \quad (9)$$

where term  $Z$  represents the number of predicted values, whereas  $y_i$  and  $\hat{Y}_i$  are the observed and the forecasted values at the  $i$  hourly time step, respectively. The term  $\bar{Y}$  is the average of the observed values. Furthermore, low MSE, MAE and MAPE values are indicators of better model performances. Differently,  $R^2$  metrics indicate better performance when its value is as close as possible to one.

## RESULTS AND DISCUSSION

This section presents and discusses the results of the methodology. The section is divided into a first part that shows the results of the tuning process for the M-LSTM and a second part that discusses the forecasting results and the comparison with the benchmark models.

### Tuning M-LSTM

In order to optimally select the number of nodes and layers for the proposed M-LSTM model, it is proposed to follow the iterative grid search process proposed in Menapace *et al.* (2021). The results of this process on the training portion of the dataset are shown in Figure 4. For the sake of clarity, the number represented in the heatmap represents the rank, ranging from 1 to 64. Higher rank values denote better performances.

Figure 4 shows the heatmap of the rank of each configuration (i.e., a combination of neurons and layers) evaluated, by averaging the  $R^2$  score with each model. In particular, the process repeats for each configuration of layers and neurons of the tuning process. Each time, the initialisation is random. Therefore, due to the stochastic nature of the training process, which is an optimisation, the results may vary. To overcome this issue, the iterative grid search allows finding trends in

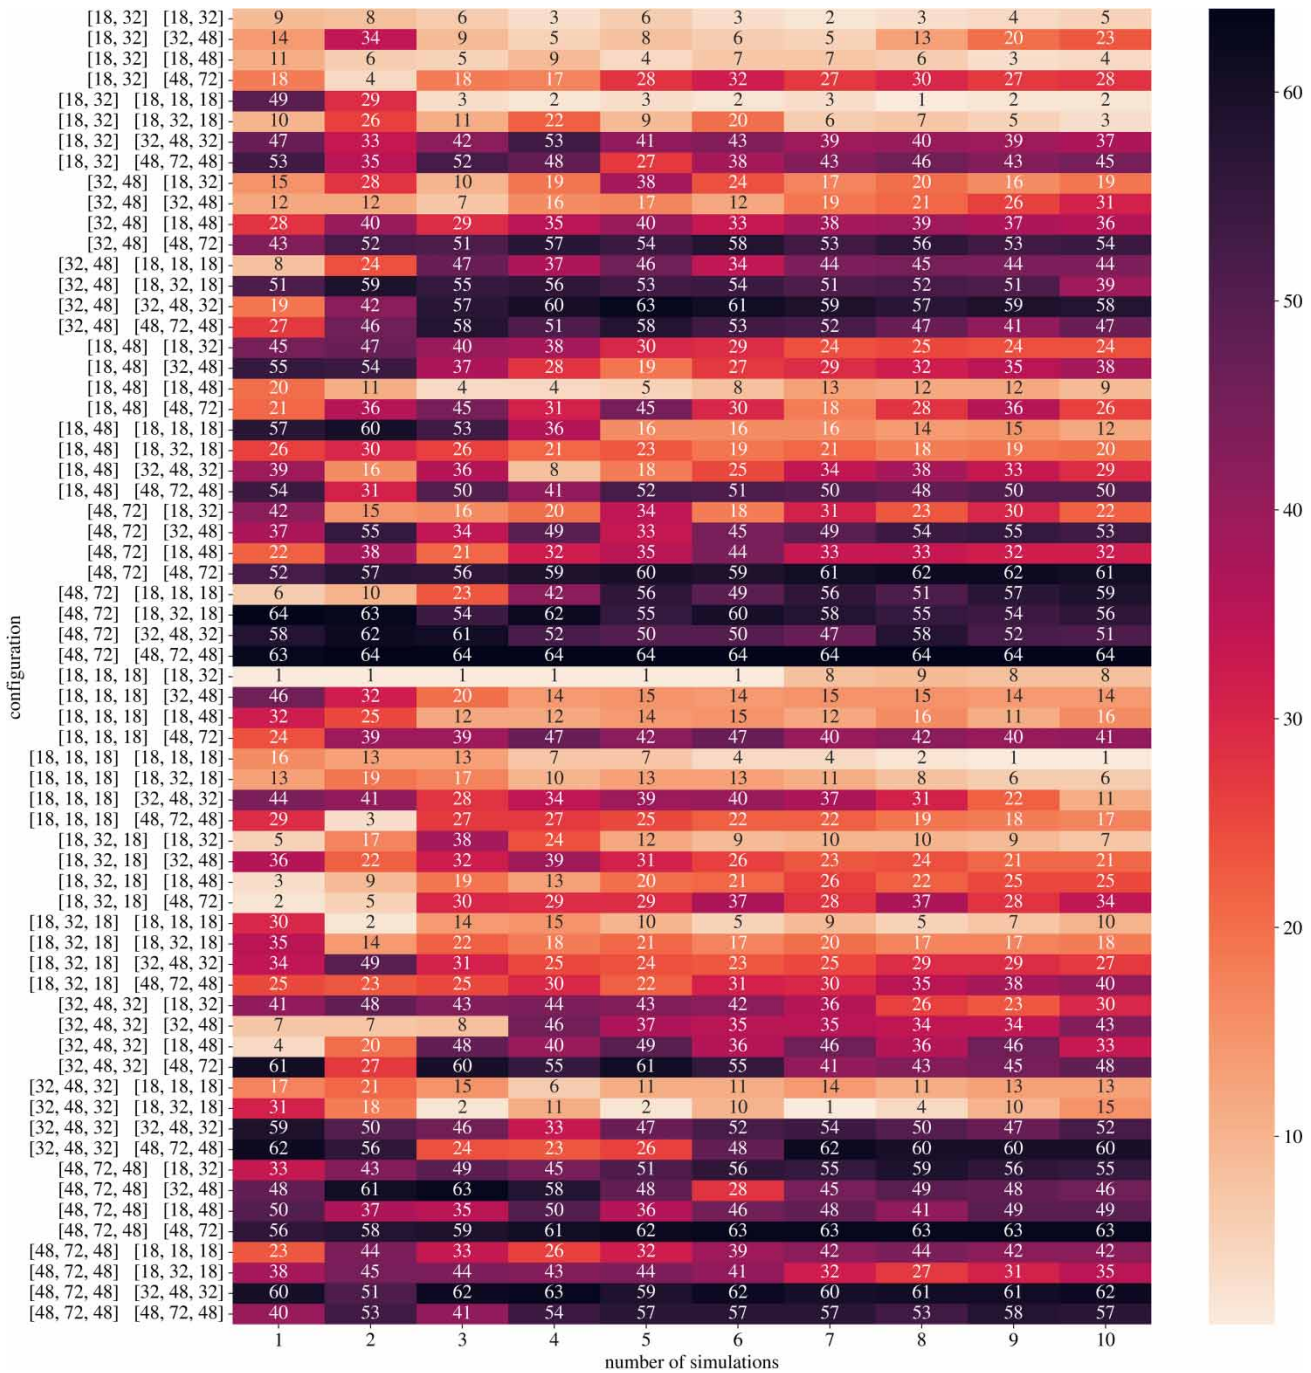

**Figure 4 |** The heatmap of the rank (ranging from 1 to 64) for the depicted configuration tested, calculated by averaging the  $R^2$  score at each iteration. The configuration displayed in the y-axis represents the neurons for each module of the M-LSTM, where the value in the first bracket refers to the water demand module and the value in the second bracket to the meteorological module.

the performance of each configuration, by repeating the tuning and evaluating the performance of the model at each iteration through the average of the  $R^2$  score with the previous model results. This process is developed for the M-LSTM model, due to the complexity of the latter and the two-module structure. In this case, the performance with a higher and more constant rank is the one that achieved better results and it is also more stable. As shown in Figure 4, in this case, the better configuration is the one that has two layers of LSTM of 48 and 72 neurons for the water demand module, while three layers of LSTM of 48, 72 and 48 neurons for the meteorological module. In addition, all the models are trained using the Adam optimiser.



## Forecasting results

This section presents and discusses the results of the proposed M-LSTM model in the short-term forecasting of the presented case study. These results highlight the prediction performance of the proposed M-LSTM, compared to the benchmark model used in this study. The metrics that refer to the task of predicting just the following hourly value of water demand are reported in Table 1.

Table 1 shows the superior performance achieved by the proposed M-LSTM model. Indeed, the M-LSTM achieves an 8.82% of MAPE, compared to the 10.427% made by the MLP and the 10.665% of the SARIMA. Furthermore, all the other metrics show better performance achieved by the proposed approach. Indeed, the better forecast provided by the M-LSTM is further shown in Figure 5, where three different periods of prediction are depicted for all the adopted models.

Figure 5 shows the different predictions of the models in three different periods of the testing dataset. In particular, it emerges that the M-LSTM can achieve better performances compared to the benchmarks. In fact, during the period in February, the M-LSTM achieves an overall 8.3% of MAPE, compared to 11.5% of the MLP and 11.8% achieved by the SARIMA. Furthermore, in April, the M-LSTM performs with 10.2% of MAPE, compared to 10.6 and 11.9% achieved by the MLP and the SARIMA, respectively. The same behaviour can be noticed during June, when the M-LSTM achieves 8.4% of MAPE, compared to 10.1 and 9.3% of the MLP and the SARIMA, respectively. It is shown that how the proposed M-LSTM model can provide a more reliable prediction of the water demand of this case study. The full tables of the MAPE for each month are reported in the supplementary material.

Regarding the task of predicting simultaneously 24-hourly values, the results are reported in Table 2.

Table 2 further highlights the ability of the proposed M-LSTM model to predict the water demand time series. In fact, the M-LSTM can achieve 0.905 of  $R^2$ , which is consistently better than 0.862 achieved by the MLP and better than 0.823 achieved by the SARIMA. It is also worth noting that the M-LSTM model used for simultaneously predicting 24 values achieves results comparable to the benchmark models used while predicting only the single next hourly value. This confirms the high prediction ability of the proposed model. These achieved performances in the 24-h prediction can also be attributed to the meteorological module, which provides the representation of the actual weather condition, especially thanks to the use of real data that are not affected by the uncertainty of the weather forecast.

To further discuss the prediction of the proposed model for the task of predicting simultaneously 24-hourly demand values, Figure 6 shows an insight into 5 days of forecast in three different periods of the datasets.

Figure 6 highlights the different predictions of the models during the three periods. It is worth noting that, in all the figures, the M-LSTM appears to be able to accurately follow the true data, providing a reliable prediction. Differently, the MLP and the SARIMA models are not able to catch well with the time series, especially during the peaks. Once again, the proposed M-LSTM model shows its higher prediction performance. In fact, during the three periods, the M-LSTM achieves consistently better performances. In fact, the M-LSTM achieves a MAPE of 9.1, 13.7 and 10.2% during the periods in February, April and June, respectively. Differently, the MLP performs with 11.4, 15.1 and 16.5% of MAPE and the SARIMA with 13.4, 15.4 and 12.9% of MAPE during February, April and June, respectively. The same performances can be noticed during the other months and the full tables are reported in the supplementary material.

Finally, it is worth to mention that the M-LSTM is more computationally intensive compared to the benchmark models. In fact, in the task of predicting 1 h, an epoch with the M-LSTM requires approximately 10 s, while just 1 s with the MLP. This means that a complete training of 100 epochs requires approximately 15 min, compared to the 2 min of the MLP. Similar performances result also in the prediction of 24 h prediction tasks.

**Table 1** | Metrics for 1-h prediction

|                   | 1-h prediction |        |        |
|-------------------|----------------|--------|--------|
|                   | M-LSTM         | MLP    | SARIMA |
| MSE ( $L^2/s^2$ ) | 1.649          | 2.169  | 2.432  |
| MAE ( $L/s$ )     | 0.864          | 1.067  | 1.084  |
| $R^2$ (–)         | 0.934          | 0.913  | 0.897  |
| MAPE (%)          | 8.82           | 10.427 | 10.665 |

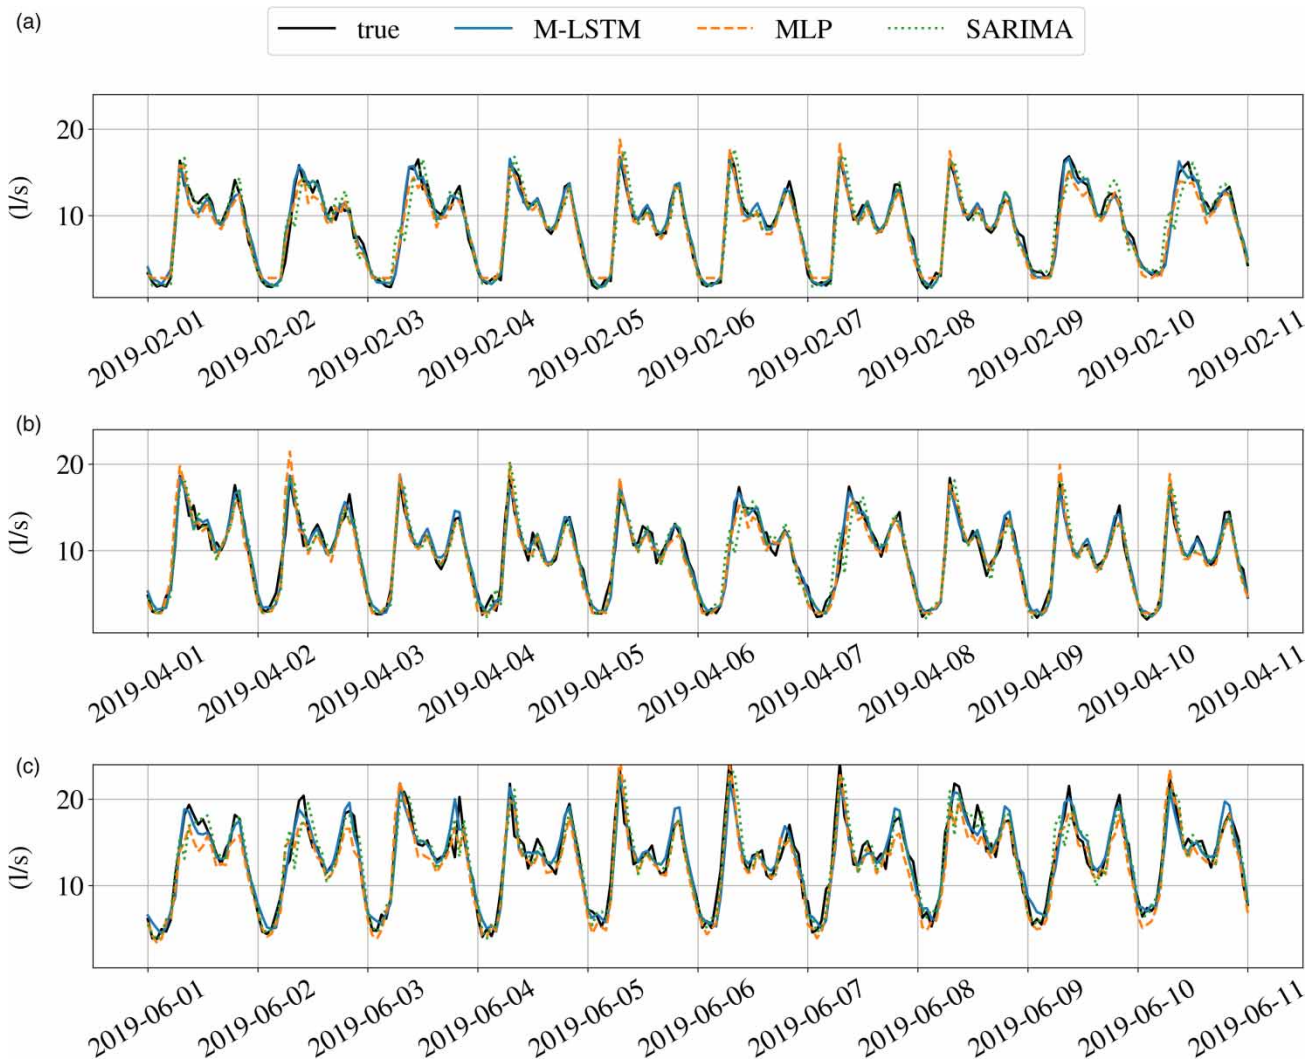

**Figure 5** | Ten days of prediction concerning the task of predicting just the following hourly value, in three different periods. Panels (a)–(c) show a period in February, April and July, respectively.

**Table 2** | Metrics for 24-h prediction

|                   | 24-h prediction |       |        |
|-------------------|-----------------|-------|--------|
|                   | M-LSTM          | MLP   | SARIMA |
| MSE ( $L^2/s^2$ ) | 2.368           | 3.444 | 4.173  |
| MAE ( $L/s$ )     | 1.042           | 1.289 | 1.45   |
| $R^2$ (–)         | 0.905           | 0.862 | 0.823  |
| MAPE (%)          | 10.592          | 12.09 | 13.932 |

## CONCLUSION

This study proposes a short-term forecasting model based on multivariate LSTM, named M-LSTM. The proposed model is designed with an innovative two-module structure to overcome the issue of using multiple input sequences with different time lengths. A first water demand module is proposed to deal only with the extraction of features from the time series of

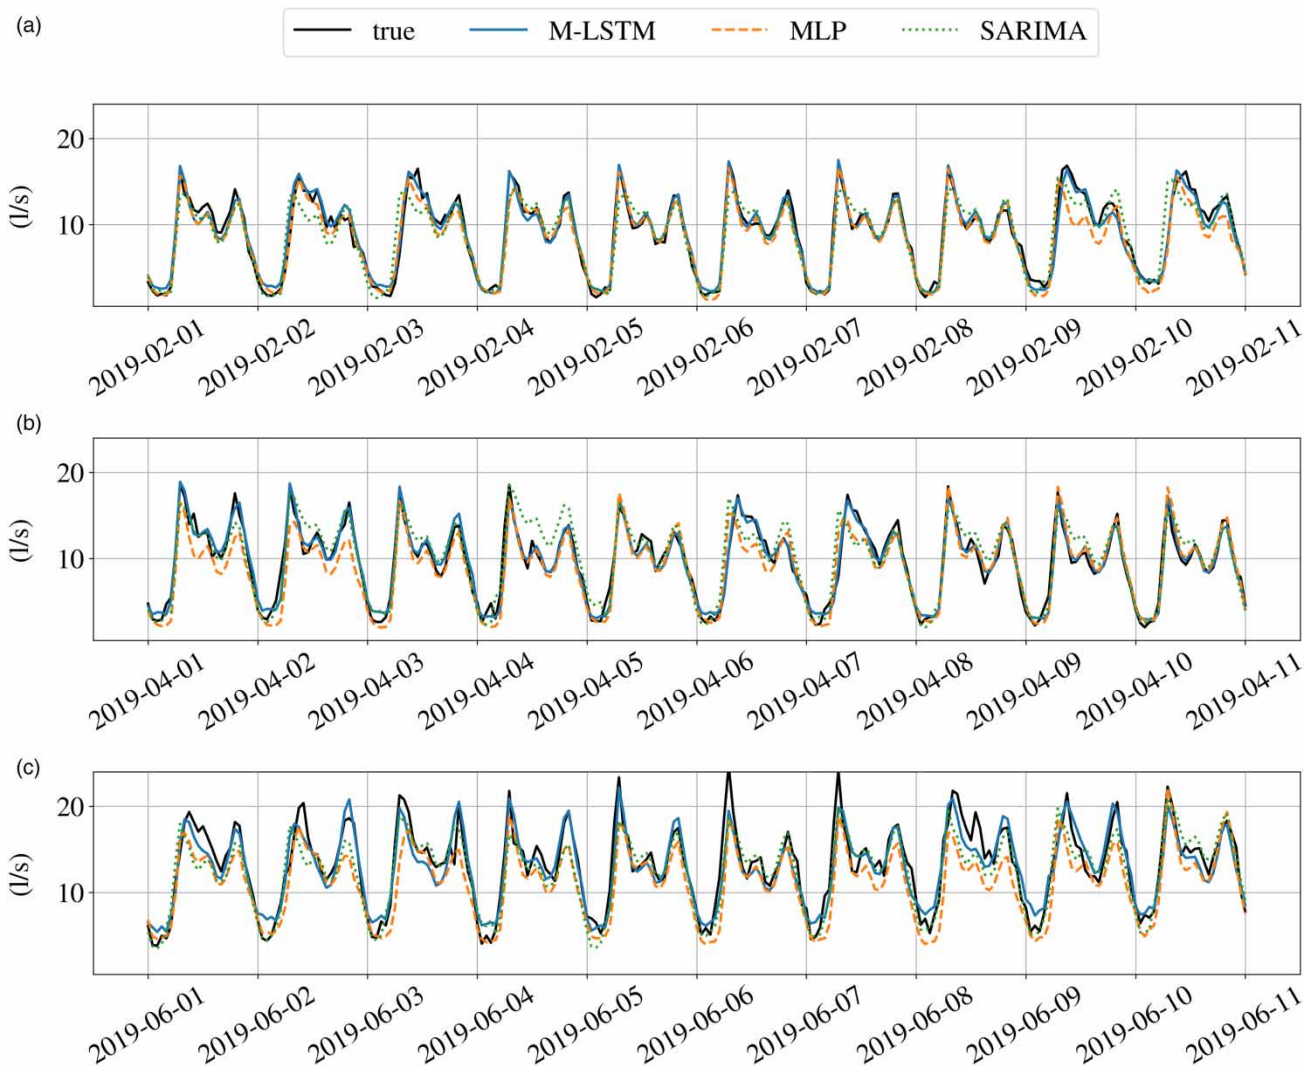

**Figure 6** | Ten days of prediction concerning the task of predicting simultaneously the following 24-hourly values, in three different periods. Panels (a)–(c) show a period in February, April and July, respectively.

water demand. This first module's scope is to deal with the long-time dependencies that characterise water demand. The second module regards the short-term representation of meteorological data. This second module aims at providing a representation of the weather condition at the prediction moment. The proposed methodology is tuned by adopting an iterative grid search approach and tested on a real-time series of water demands. In addition, two conventional benchmark models are used to test the performance of the M-LSTM: an MLP model and a SARIMA model.

The results show that the M-LSTM model outperforms both benchmarks. In particular, the model is tested on two prediction tasks: the 1-h prediction task, where the aim is to predict only the following hourly water demand value, and the 24-h prediction task, where the purpose is to predict simultaneously 24 values of water demand and cover a whole day. The proposed M-LSTM achieved superior performances in both tasks. Especially while predicting 24 values, the module composition of the M-LSTM appears to be particularly effective for providing a reliable prediction. The tests made in this study highlighted the high prediction capability of the proposed M-LSTM model.

Future works will address the use of meteorological forecasts instead of historical values for weather data. Furthermore, the uncertainty related to these variables will also be taken into account during the model evaluation.

## ACKNOWLEDGEMENTS

This study has been partially funded by the project ‘TESES-Urb–Techno-economic methodologies to investigate sustainable energy scenarios at urban level’ of the Free University of Bozen-Bolzano. The authors thank the anonymous reviewers for their valuable contribution. The authors also thank Novareti S.P.A for providing the data for this study.

## DATA AVAILABILITY STATEMENT

Data cannot be made publicly available; readers should contact the corresponding author for details.

## CONFLICT OF INTEREST

The authors declare there is no conflict.

## REFERENCES

- Abadi, M., Barham, P., Chen, J., Chen, Z., Davis, A., Dean, J., Devin, M., Ghemawat, S., Irving, G., Isard, M., Kudlur, M., Levenberg, J., Monga, R., Moore, S., Murray, D. G., Steiner, B., Tucker, P., Vasudevan, V., Warden, P., Wicke, M., Yu, Y. & Zheng, X. 2016 Tensorflow: a system for large-scale machine learning. *12th Symp. Oper. Syst. Des. Implement.* **16**, 265–283.
- Adamowski, J. & Karapataki, C. 2010 Comparison of multivariate regression and artificial neural networks for peak urban water-demand forecasting: evaluation of different ANN learning algorithms. *J. Hydrol. Eng.* **15** (10), 729–743. [https://doi.org/10.1061/\(ASCE\)HE.1943-5584.0000245](https://doi.org/10.1061/(ASCE)HE.1943-5584.0000245).
- Alvisi, S., Franchini, M. & Marinelli, A. 2007 A short-term, pattern-based model for water-demand forecasting. *J. Hydroinf.* **9** (1), 39–50. <https://doi.org/10.2166/hydro.2006.016>.
- Ambrosio, J. K., Brentan, B. M., Herrera, M., Luvizotto, E., Ribeiro, L. & Izquierdo, J. 2019 Committee machines for hourly water demand forecasting in water supply systems. *Math. Probl. Eng.* **2019**, 1–11. <https://doi.org/10.1155/2019/9765468>.
- Avesani, D., Zanfei, A., Di Marco, N., Galletti, A., Ravazzolo, F., Righetti, M. & Majone, B. 2022 Short-term hydropower optimization driven by innovative time-adapting econometric model. *Appl. Energy* **310**, 118510. <https://doi.org/10.1016/j.apenergy.2021.118510>.
- Bakker, M., Vreeburg, J., Palmen, L., Sperber, V., Bakker, G. & Rietveld, L. 2013 Better water quality and higher energy efficiency by using model predictive flow control at water supply systems. *J. Water Supply Res. Technol.* **62** (1), 1–13. IWA Publishing.
- Bonilla, C. A., Zanfei, A., Brentan, B., Montalvo, I. & Izquierdo, J. 2022 A digital twin of a water distribution system by using graph convolutional networks for pump speed-based state estimation. *Water* **14** (4), 514. MDPI.
- Bougadis, J., Adamowski, K. & Diduch, R. 2005 Short-term municipal water demand forecasting. *Hydrol. Process.* **19** (1), 137–148. <https://doi.org/10.1002/hyp.5763>.
- Brentan, B. M., Meirelles, G., Herrera, M., Luvizotto, E. & Izquierdo, J. 2017 Correlation analysis of water demand and predictive variables for short-term forecasting models. *Math. Probl. Eng.* **2017**, 1–10. <https://doi.org/10.1155/2017/6343625>.
- Chollet, F. *et al.* 2015 ‘Keras.’ GitHub.
- Chung, J., Gulcehre, C., Cho, K. & Bengio, Y. 2014 ‘Empirical Evaluation of Gated Recurrent Neural Networks on Sequence Modeling.’ *ArXiv14123555 Cs*.
- Donkor, E. A., Mazzuchi, T. A., Soyer, R. & Alan Roberson, J. 2014 Urban water demand forecasting: review of methods and models. *J. Water Resour. Plann. Manage.* **140** (2), 146–159. [https://doi.org/10.1061/\(ASCE\)WR.1943-5452.0000314](https://doi.org/10.1061/(ASCE)WR.1943-5452.0000314).
- Elkiran, G., Nourani, V., Elvis, O. & Abdullahi, J. 2021 Impact of climate change on hydro-climatological parameters in north Cyprus: application of artificial intelligence-based statistical downscaling models. *J. Hydroinf.* **23** (6), 1395–1415. <https://doi.org/10.2166/hydro.2021.091>.
- Elman, J. L. 1990 Finding structure in time. *Cogn. Sci.* **14** (2), 179–211. Wiley Online Library.
- Fiorillo, D., Kapelan, Z., Xenochristou, M., De Paola, F. & Giugni, M. 2021 Assessing the impact of climate change on future water demand using weather data. *Water Resour. Manage.* **35** (5), 1449–1462. <https://doi.org/10.1007/s11269-021-02789-4>.
- Guo, G., Liu, S., Wu, Y., Li, J., Zhou, R. & Zhu, X. 2018 Short-term water demand forecast based on deep learning method. *J. Water Resour. Plann. Manage.* **144** (12), 04018076. [https://doi.org/10.1061/\(ASCE\)WR.1943-5452.0000992](https://doi.org/10.1061/(ASCE)WR.1943-5452.0000992).
- Herrera, M., Torgo, L., Izquierdo, J. & Pérez-García, R. 2010 Predictive models for forecasting hourly urban water demand. *J. Hydrol.* **387** (1–2), 141–150. <https://doi.org/10.1016/j.jhydrol.2010.04.005>.
- Hochreiter, S. & Schmidhuber, J. 1997 Long short-term memory. *Neural Comput.* **9** (8), 1735–1780. MIT Press.
- House-Peters, L. A. & Chang, H. 2011 Urban water demand modeling: review of concepts, methods, and organizing principles: REVIEW. *Water Resour. Res.* **47** (5). <https://doi.org/10.1029/2010WR009624>.
- Jordan, M. I. 1997 Serial order: a parallel distributed processing approach. *Adv. Psychol.* **121**, 471–495. Elsevier.
- Kingma, D. P. & Ba, J. 2014 ‘Adam: A Method for Stochastic Optimization.’ *ArXiv14126980 Cs*.
- Mboweni, I. V., Abu-Mahfouz, A. M. & Ramotsoela, D. T. 2021 A machine learning approach to intrusion detection in water distribution systems – a review. In *IECON 2021 – 47th Annu. Conf. IEEE Ind. Electron. Soc.*, Toronto, ON, Canada. IEEE, pp. 1–7.

- Menapace, A., Thellufsen, J. Z., Pernigotto, G., Roberti, F., Gasparella, A., Righetti, M., Baratieri, M. & Lund, H. 2020a The design of 100% renewable smart urban energy systems: the case of Bozen-Bolzano. *Energy* **207**, 118198. <https://doi.org/10.1016/j.energy.2020.118198>.
- Menapace, A., Zanfei, A., Felicetti, M., Avesani, D., Righetti, M. & Gargano, R. 2020b Burst detection in water distribution systems: the issue of dataset collection. *Appl. Sci.* **10** (22), 8219. <https://doi.org/10.3390/app10228219>.
- Menapace, A., Zanfei, A. & Righetti, M. 2021 Tuning ANN hyperparameters for forecasting drinking water demand. *Appl. Sci.* **11** (9), 4290. <https://doi.org/10.3390/app11094290>.
- Mu, L., Zheng, F., Tao, R., Zhang, Q. & Kapelan, Z. 2020 Hourly and daily urban water demand predictions using a long short-term memory based model. *J. Water Resour. Plann. Manage.* **146** (9), 05020017. [https://doi.org/10.1061/\(ASCE\)WR.1943-5452.0001276](https://doi.org/10.1061/(ASCE)WR.1943-5452.0001276).
- Oliveira, P. J., Steffen, J. L. & Cheung, P. 2017 Parameter estimation of Seasonal ARIMA models for water demand forecasting using the harmony search algorithm. *Procedia Eng.* **186**, 177–185. <https://doi.org/10.1016/j.proeng.2017.03.225>.
- Pacchin, E., Gagliardi, F., Alvisi, S. & Franchini, M. 2019 A comparison of short-term water demand forecasting models. *Water Resour. Manage.* **33** (4), 1481–1497. <https://doi.org/10.1007/s11269-019-02213-y>.
- Pulido-Calvo, I. & Gutierrez-Estrada, J. C. 2009 Improved irrigation water demand forecasting using a soft-computing hybrid model. *Biosyst. Eng.* **102** (2), 202–218. Elsevier.
- Rahim, M. S., Nguyen, K. A., Stewart, R. A., Giurco, D. & Blumenstein, M. 2020 Machine learning and data analytic techniques in digital water metering: a review. *Water* **12** (1). <https://doi.org/10.3390/w12010294>.
- Ramos, H. M., McNabola, A., López-Jiménez, P. A. & Pérez-Sánchez, M. 2020 Smart water management towards future water sustainable networks. *Water* **12** (1), 58. Multidisciplinary Digital Publishing Institute.
- Savic, D. 2019 *Artificial Intelligence – How can Water Planning and Management Benefit From?*
- Schmidhuber, J. 2015 Deep learning in neural networks: an overview. *Neural Netw.* **61**, 85–117. <https://doi.org/10.1016/j.neunet.2014.09.003>.
- Wang, X., Zhang, J., Shahid, S., Guan, E., Wu, Y., Gao, J. & He, R. 2016 Adaptation to climate change impacts on water demand. *Mitigation Adapt. Strategies Global Change* **21** (1), 81–99. <https://doi.org/10.1007/s11027-014-9571-6>.
- Wu, Y. & Liu, S. 2017 A review of data-driven approaches for burst detection in water distribution systems. *Urban Water J.* **14** (9), 972–983. <https://doi.org/10.1080/1573062X.2017.1279191>.
- Xenochristou, M. & Kapelan, Z. 2020 An ensemble stacked model with bias correction for improved water demand forecasting. *Urban Water J.* **17** (3), 212–223. <https://doi.org/10.1080/1573062X.2020.1758164>.
- Yu, P.-S., Yang, T.-C., Kuo, C.-M. & Chen, S.-T. 2014 Development of an integrated computational tool to assess climate change impacts on water supply-demand and flood inundation. *J. Hydroinf.* **16** (3), 710–730. <https://doi.org/10.2166/hydro.2013.018>.
- Zanfei, A., Menapace, A., Pisaturo, G. R. & Righetti, M. 2020 Calibration of water leakages and valve setting in a real water supply system. *Environ. Sci. Proc.* **2** (1), 41. <https://doi.org/10.3390/environsciproc2020002041>.
- Zanfei, A., Brentan, B. M., Menapace, A., Righetti, M. & Herrera, M. 2022a Graph convolutional recurrent neural networks for water demand forecasting. *Water Resour. Res.* **58** (7). <https://doi.org/10.1029/2022WR032299>.
- Zanfei, A., Menapace, A., Granata, F., Gargano, R., Frisinghelli, M. & Righetti, M. 2022b An ensemble neural network model to forecast drinking water consumption. *J. Water Resour. Plann. Manage.* **148** (5), 04022014. [https://doi.org/10.1061/\(ASCE\)WR.1943-5452.0001540](https://doi.org/10.1061/(ASCE)WR.1943-5452.0001540).
- Zanfei, A., Menapace, A., Brentan, B. M. & Righetti, M. 2022c How does missing data imputation affect the forecasting of urban water demand? *J. Water Resour. Plann. Manage.* [https://doi.org/10.1061/\(ASCE\)WR.1943-5452.0001624](https://doi.org/10.1061/(ASCE)WR.1943-5452.0001624).

First received 21 April 2022; accepted in revised form 27 August 2022. Available online 8 September 2022
